# Supplementary material for: Dot1l cooperates with Npm1 to repress endogenous retrovirus MERVL in embryonic stem cells
Source: PubMed Central journal article supplement — Nucleic Acids Res. 2023 Jul 31;51(17):8970–86. doi: 10.1093/nar/gkad640 (PMC10516645; doi:10.1093/nar/gkad640), 2023-07-31
Supplement: gkad640_supplemental_file.pdf [file gkad640_supplemental_file.pdf]

## Supplementary Figures and Tables

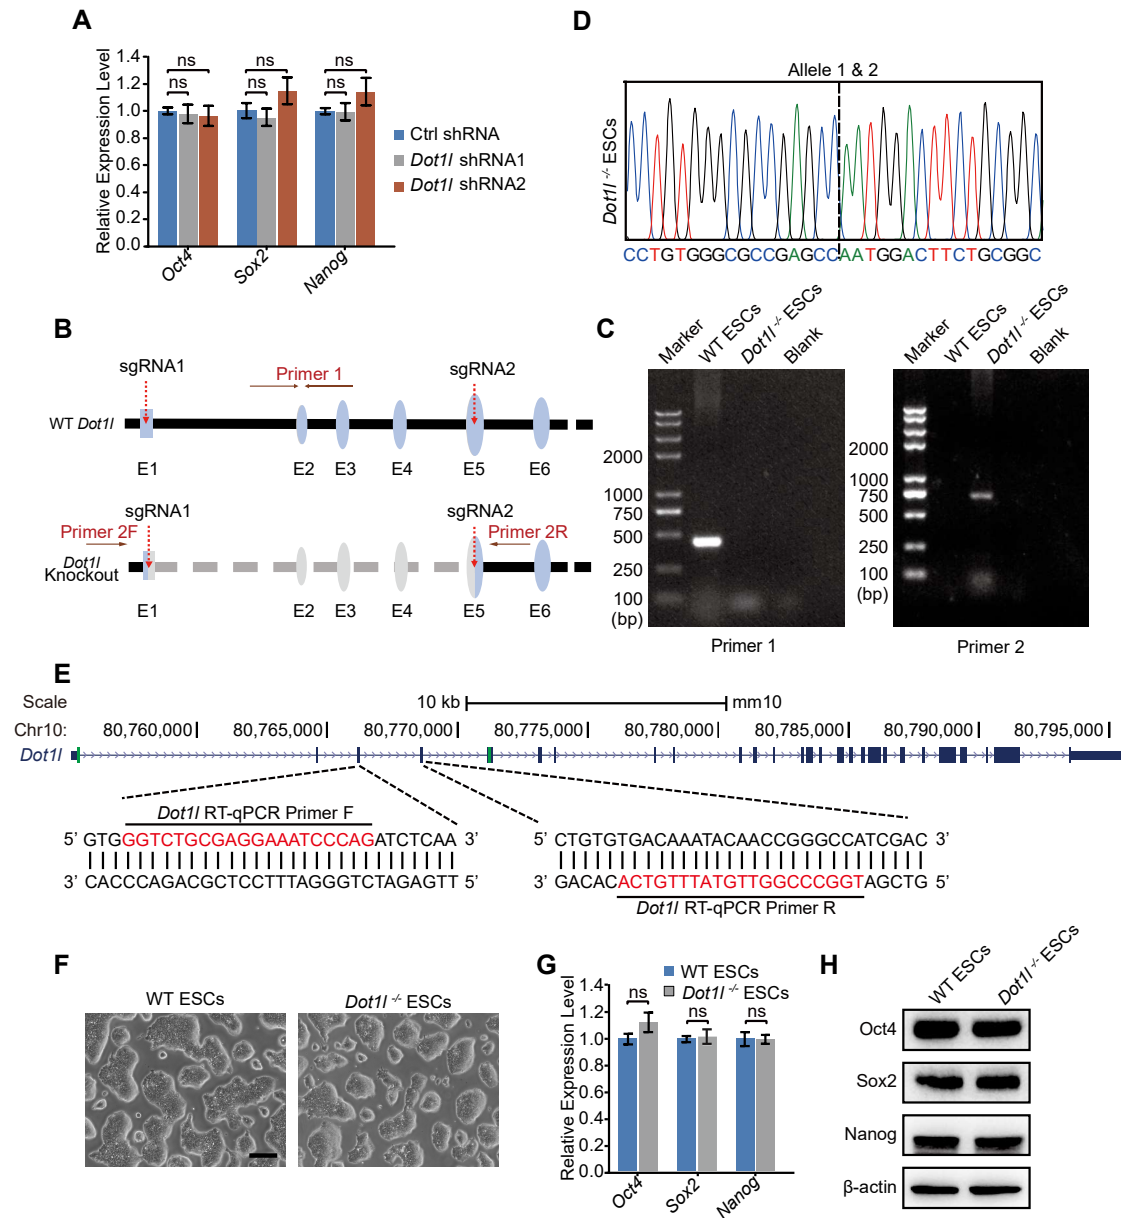

### Supplementary Figure S1. Knocking out *Dot1l* in ESCs

- (A) qPCR analysis of the expression of pluripotency genes (*Oct4*, *Sox2* and *Nanog*) after the depletion of *Dot1l* in ESCs. qPCR data are presented as mean ± s.e.m. (n = 3 independent experiments).
- (B) Schematic showing CRISPR/Cas9-mediated deletion of *Dot1l* using two sgRNAs. Locations of primers were used to distinguish *Dot1l*<sup>-/-</sup> clones from WT ESCs are shown as horizontal red arrows. WT: wild-type; E: exon.
- (C) An agarose gel image illustrating the PCR-based genotyping assay of the *Dot1l*<sup>-/-</sup> ESCs with primers in (B).
- (D) DNA sequencing results of mutation sites in *Dot1l*<sup>-/-</sup> ESCs.
- (E) Schematic of the location of *Dot1l* RT-qPCR primers. The sgRNA target sequences on exon 1 and exon 5 of the *Dot1l* gene are highlighted in green.
- (F) Cell morphology of WT ESCs and *Dot1l*<sup>-/-</sup> ESCs. Scale bar, 100 μm.
- (G) qPCR analysis of the expression of pluripotency genes in WT ESCs and *Dot1l*<sup>-/-</sup> ESCs.

Data are presented as mean  $\pm$  s.e.m. (n = 3 independent experiments). ns: non-significant in Student's *t*-test.

**(H)** Western blot analysis of pluripotency genes in WT ESCs and *Dot1<sup>-/-</sup>* ESCs.  $\beta$ -actin was used as a loading control.

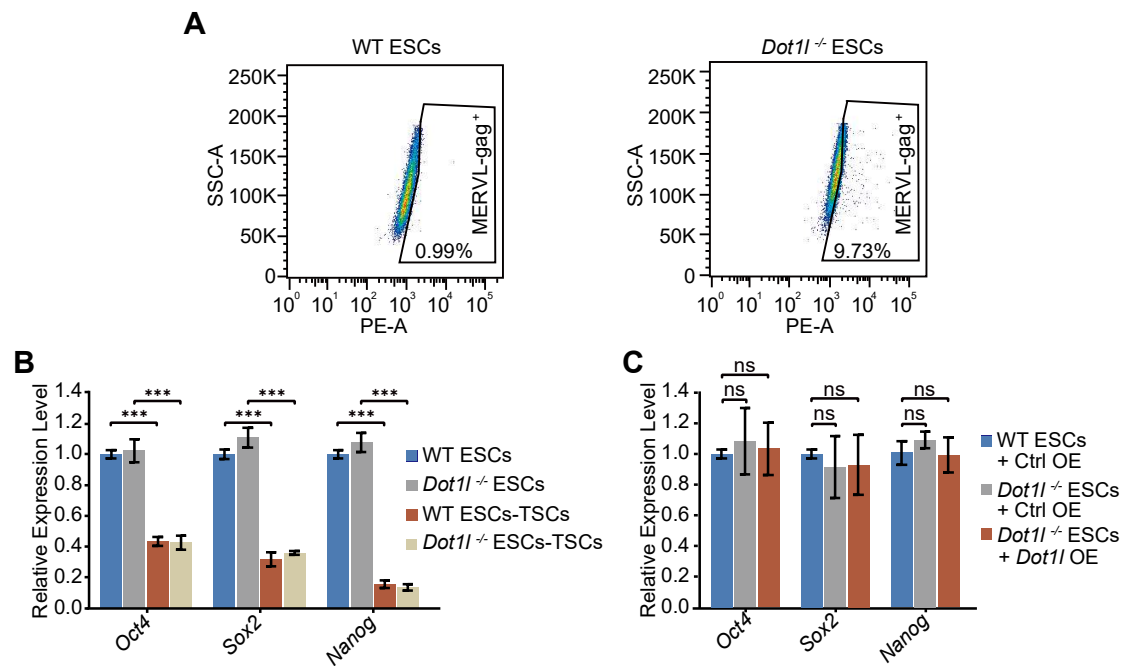

**Supplementary Figure S2. Expression of pluripotency genes after differentiation and rescue**

- (A)** Representative flow cytometry scatter diagram analysis of the MERVL-gag<sup>+</sup> population in WT ESCs and *Dot11*<sup>-/-</sup> ESCs.
- (B)** qPCR analysis of the expression of pluripotency genes in WT ESCs and *Dot11*<sup>-/-</sup> ESCs differentiated into TSCs respectively. qPCR data are presented as mean ± s.e.m. (n = 3 independent experiments).
- (C)** qPCR analysis of the expression of pluripotency genes after *Dot11* overexpression (OE) in *Dot11*<sup>-/-</sup> ESCs. Data are presented as mean ± s.e.m. (n = 3 independent experiments) for the qPCR results. ns: non-significant, \*\*\**p* < 0.001 in Student's *t*-test.

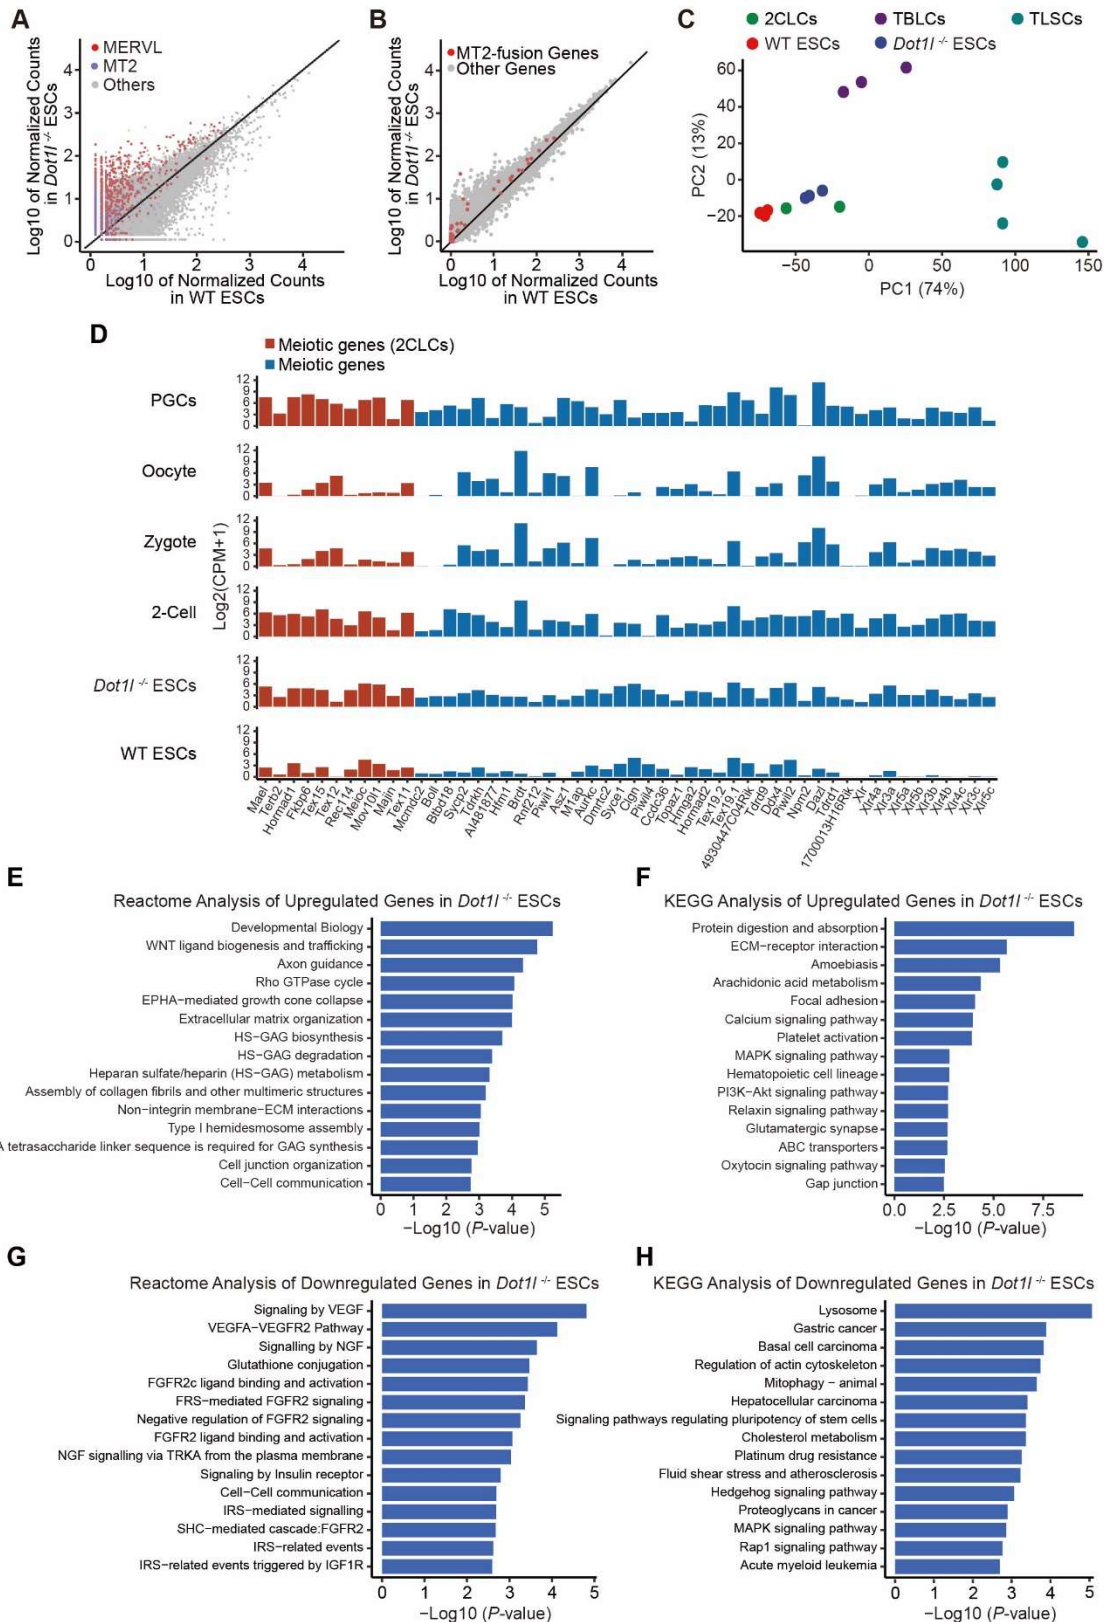

### Supplementary Figure S3. Expression of MERVL/MT2 loci and fusion genes in *Dot11*<sup>-/-</sup> ESCs

(A) Dot plot of all TEs in WT ESCs and *Dot11*<sup>-/-</sup> ESCs. Red dots represent MERVL, purple dots represent MT2.

- (B)** Dot plot of all expressed genes in WT ESCs and *Dot1<sup>-/-</sup>* ESCs. Genes with alternative transcript(s) overlapped with MT2 are labeled in red.
- (C)** Principal component analysis of *Dot1<sup>-/-</sup>* ESCs, TBLCs, TLSCs and published 2CLCs based on gene expression. WT, wild type; TBLCs, totipotent blastomere-like cells; TLSCs, totipotent-like stem cells; 2CLCs, 2-cell like cells.
- (D)** Upregulated meiosis genes enriched in the GO term in *Dot1<sup>-/-</sup>* ESCs.
- (E-F)** Reactome (E) and KEGG (F) pathway analysis of upregulated genes in *Dot1<sup>-/-</sup>* ESCs.
- (G-H)** Reactome (G) and KEGG (H) pathway analysis of downregulated genes in *Dot1<sup>-/-</sup>* ESCs.

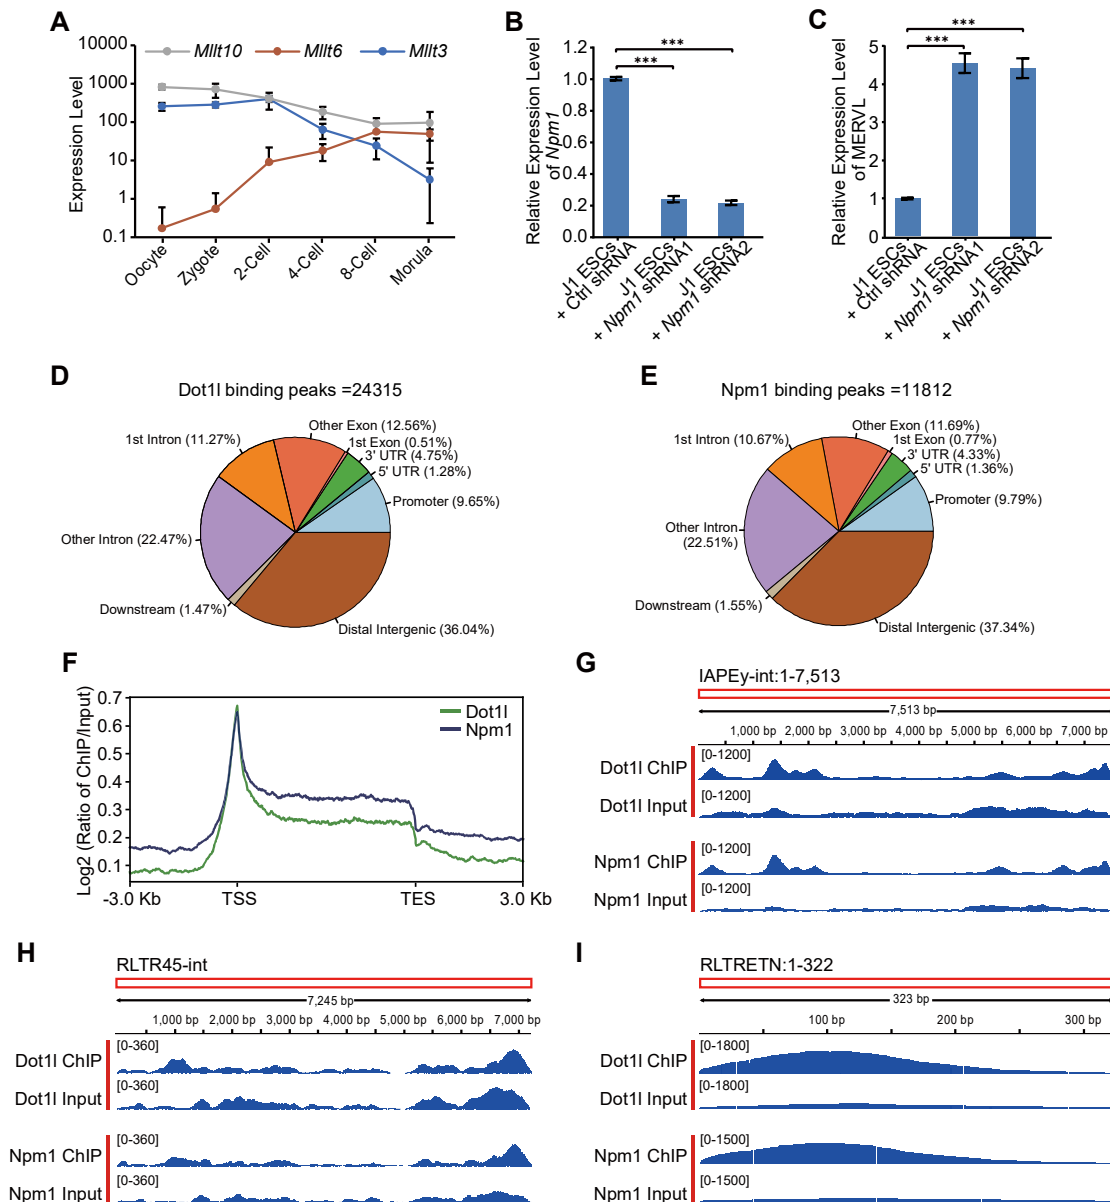

### Supplementary Figure S4. Binding profile of Npm1 and Dot1l in ESCs

- (A) The expression level of *Milt10*, *Milt6* and *Milt3* during early embryogenesis according to published RNA-seq data.
- (B) qPCR analysis of the expression of *Npm1* in J1 ESCs treated with control (Ctrl) shRNA or *Npm1* shRNAs. Data are presented as mean  $\pm$  s.e.m. (n = 3 independent experiments).
- (C) qPCR analysis of the expression of MERVL after the depletion of *Npm1* in J1 ESCs. Data are presented as mean  $\pm$  s.e.m. (n = 3 independent experiments). \*\*\* $p$  < 0.001 in Student's *t*-test.
- (D-E) Locations of Dot1l (D) and Npm1 (E) binding peaks relative to the nearest transcription units (Promoter, 2 kb around transcriptional start sites).
- (F) PlotProfile of the distribution of Dot1l and Npm1 binding peaks on gene characteristics. The ChIP-seq signal was calculated as the log<sub>2</sub> ratio of normalized reads relative to the input. TSS, transcription start site; TES, transcription termination site; -3 Kb, TSS

upstream 3 Kb; 3 Kb, TES downstream 3 Kb.

**(G-I)** Integrative Genomics Viewer (IGV) visualized the Dot1l and Npm1 ChIP-seq signals mapped to the consensus sequence of IAPEy-int (G), RLTR45-int (H) and RLTR45-int (I) respectively.



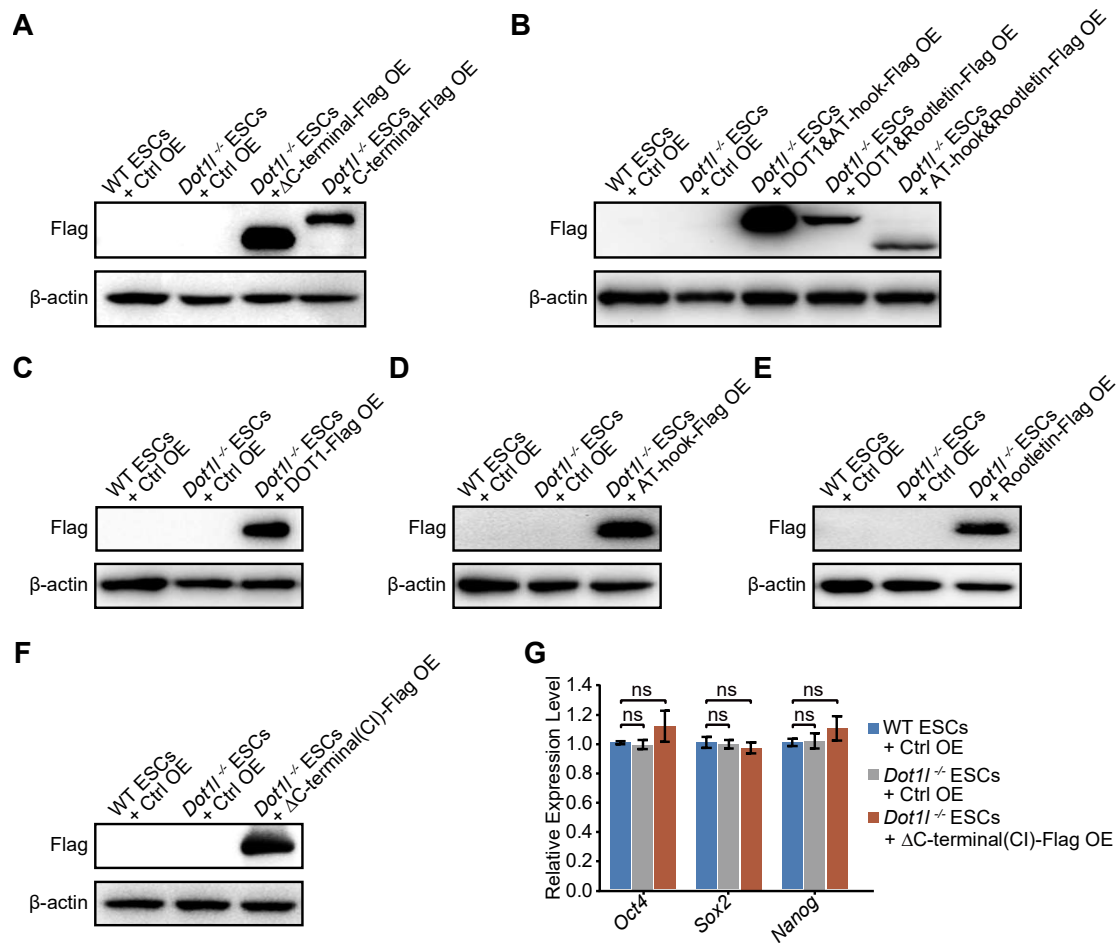

### Supplementary Figure S5. Generation of *Dot1l*-mutant cell lines

- (A-B)** Western blot analysis of the expression of *Dot1l* mutants using Flag antibody in *Dot1l*<sup>-/-</sup> ESCs. β-actin was used as a loading control. Ctrl OE: control vector overexpression; Δ: deletion.
- (C-E)** Western blot analysis of the expression of *Dot1l* DOT1 (C), *Dot1l* AT-hook (D), *Dot1l* Rootletin (E) mutants using Flag antibody in *Dot1l*<sup>-/-</sup> ESCs. β-actin was used as a loading control. Ctrl OE: control vector overexpression.
- (F)** Western blot analysis of *Dot1l* ΔC-terminal (CI) mutant using Flag antibody in *Dot1l*<sup>-/-</sup> ESCs. β-actin was used as a loading control. Ctrl OE: control vector overexpression; CI: catalytic inactive.
- (G)** qPCR analysis of the expression of pluripotency genes after rescue of *Dot1l* ΔC-terminal (CI) mutant in *Dot1l*<sup>-/-</sup> ESCs. Ctrl OE: control vector overexpression; CI: catalytic inactive. qPCR data are presented as mean ± s.e.m. (n = 3 independent experiments). ns: non-significant in Student's *t*-test.

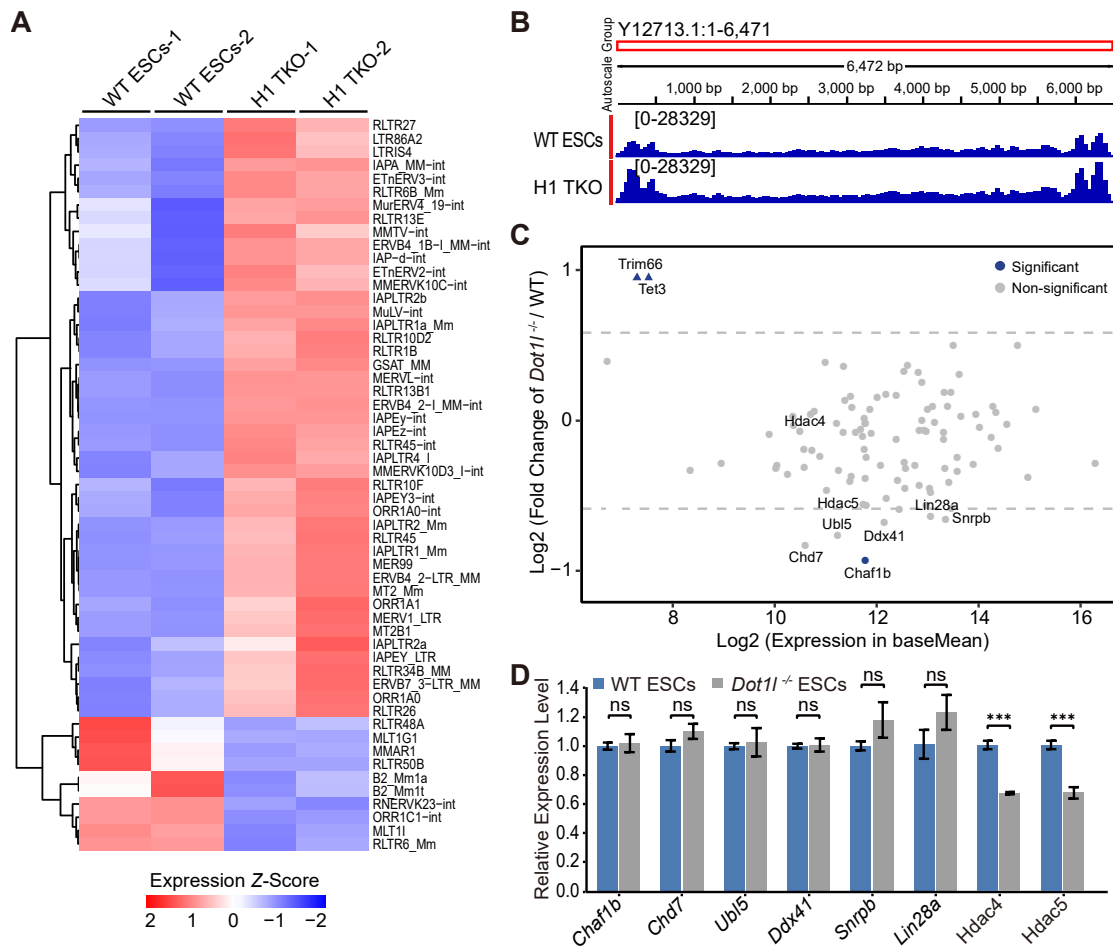

### Supplementary Figure S6. Retrotransposon expression after the knockout of H1 variants

- (A)** Expression heatmap of retrotransposons after H1 TKO (triple-knockout). Differentially expressed TEs were defined as TEs with fold change > 1.5 and FDR adjusted  $P < 0.05$  (Wald test).
- (B)** The ATAC-seq reads mapped to MERVL in WT ESCs and H1 TKO ESCs was visualized using Integrative Genomics Viewer (IGV).
- (C)** A scatter diagram shows transcriptome analysis of the expression of 100 reported MERVL repressors after *Dot1* knockout. Blue dots or triangles indicate repressors with significant expression change (adjusted  $p < 0.05$ , Wald test). Triangles represent repressors with  $\log_2$  (fold change) > 1.
- (D)** qPCR validation of the expression of indicated MERVL repressors in *Dot1*<sup>-/-</sup> ESCs. qPCR data are presented as mean  $\pm$  s.e.m. ( $n = 3$  independent experiments). ns: non-significant, \*\*\* $p < 0.001$  in Student's  $t$ -test.

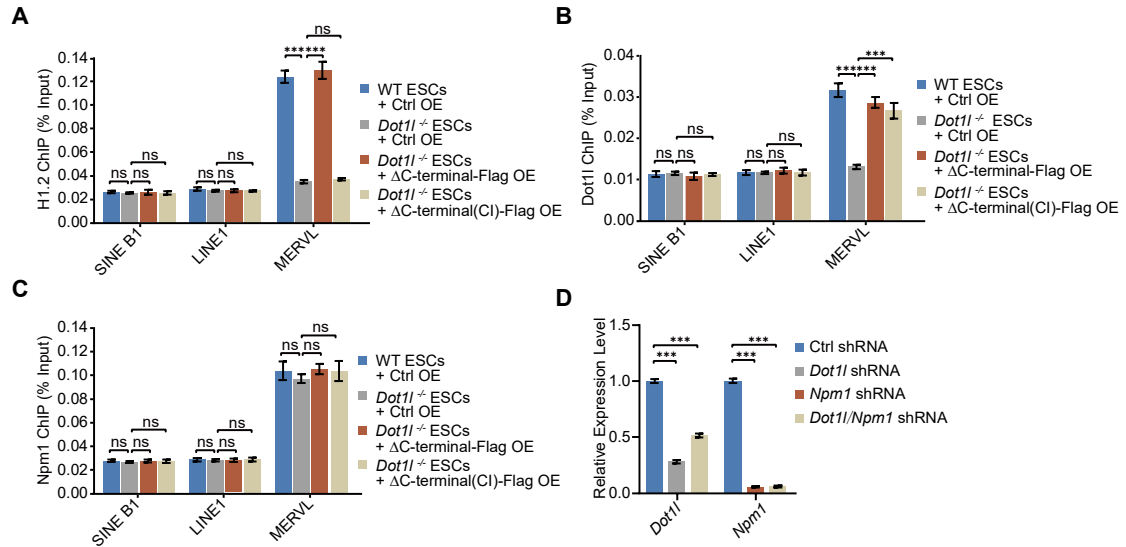

**Supplementary Figure S7. *Dot11* catalytic activity is required for H1.2 enrichment on chromatin**

- (A) ChIP-qPCR analysis of H1.2 binding on MERVL. ChIP-qPCR data were normalized to input and that of the control region. Data are presented as mean  $\pm$  s.e.m. (n = 3 independent experiments).
- (B) ChIP-qPCR analysis of *Dot11* and catalytically-inactivated *Dot11* mutant binding on MERVL. ChIP-qPCR data were normalized to input and that of the control region. Data are presented as mean  $\pm$  s.e.m. (n = 3 independent experiments).
- (C) ChIP-qPCR analysis of *Npm1* binding on MERVL. ChIP-qPCR data were normalized to input and that of the control region. Data are presented as mean  $\pm$  s.e.m. (n = 3 independent experiments).
- (D) qPCR analysis of the expression levels of *Dot11* and *Npm1* following their individual depletion as well as simultaneous depletion. Data are presented as mean  $\pm$  s.e.m. (n = 3 independent experiments). ns: non-significant, \*\*\**p* < 0.001 in Student's *t*-test.

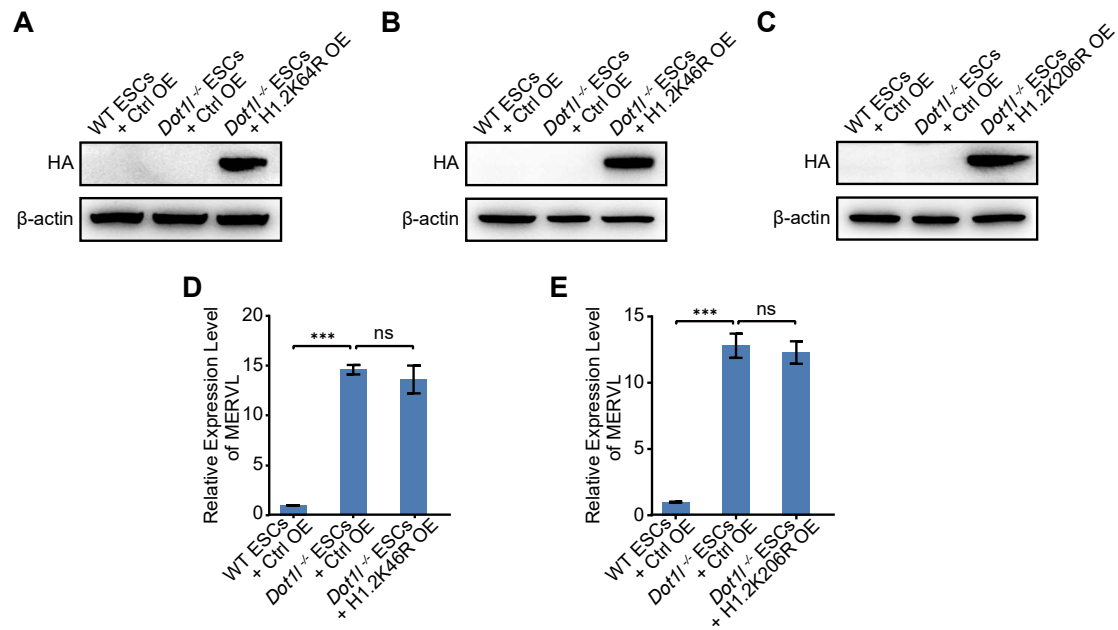

### Supplementary Figure S8. Screening histone H1.2 ubiquitination sites

(A-C) Western blot analysis of the overexpression of H1.2K64R (A), H1.2K46R (B), H1.2K206R (C) in *Dot11*<sup>-/-</sup> ESCs. Ctrl OE, control vector overexpression; K, Lysine; R, Arginine. β-actin was used as a loading control.

(D-E) qPCR analysis of the expression of MERVL after overexpression of H1.2K46R (D) and H1.2K206R (E) in *Dot11*<sup>-/-</sup> ESCs. Ctrl OE, control vector overexpression; K, Lysine; R, Arginine. Data are presented as mean ± s.e.m. (n = 3 independent experiments). ns: non-significant, \*\*\**p* < 0.001 in Student's *t*-test.

| <b>Supplementary Table S1. Sequences of primers, shRNAs and guide RNAs</b> |                                |                             |
|----------------------------------------------------------------------------|--------------------------------|-----------------------------|
| <b>Gene</b>                                                                | <b>Sequence F ( 5'-3' )</b>    | <b>Sequence R ( 5'-3' )</b> |
| <i>Dot1l</i>                                                               | GGTCTGCGAGGAAATCCCAG           | TGGCCCGTTGTATTTGTCA         |
| <i>Oct4</i>                                                                | GTGGAAAGCAACTCAGAGG            | GGTCCACCTTCTCCAAC           |
| <i>Sox2</i>                                                                | GCGGAGTGAAACTTTTGTCC           | CGGAAGCGTGTACTTATCCTT       |
| <i>Nanog</i>                                                               | TTGCTTACAAGGTCTGCTACT          | ACTGGTAGAAGAATCAGGGCT       |
| <i>Cdx2</i>                                                                | AGGCTGAGCCATGAGGAGTA           | TGAGGTCCATAATTCCAAC         |
| <i>Eomes</i>                                                               | CAATGTTTTTCGTGGAAGTGG          | GTTAGGAGATTCTGGGTGAA        |
| <i>Plet1</i>                                                               | AACGATTCAGTCAGTGCCGT           | TGACTTTGAGGCTGTGCGAT        |
| <i>Ascl2</i>                                                               | AAGCACACCTTGACTGGTACG          | AAGTGGACGTTTGCACCTCA        |
| <i>Testv1</i>                                                              | GGTGCTCCAAATCTGAGACACTT        | ATAGATCCCAATCGGCAATCC       |
| <i>Zfp352</i>                                                              | AAGTCCCACATCTGAAGAAACAC        | GGGTATGAGGATCACCCACA        |
| <i>Usp17lb</i>                                                             | TCTCCTTCCCAGAAGATCCAG          | ACTCTCCCAACTCAGACTGT        |
| <i>Gm8300</i>                                                              | TACTCACCAGGTCAATGCAGG          | GTCTGGCTCCTGATAGTTAC        |
| <i>Gm4027</i>                                                              | AGATGGTACTCACCAGGTCAA          | ATGTCCCAGAGTACTGGCTT        |
| <i>Gm4340</i>                                                              | TTGTTGGAATTTGGCTGCC            | CATGGGTGAAAGCTGGCTTA        |
| <i>Sp110</i>                                                               | ATGAAGGTGAACATCGCCTATG         | GGACAGAGGGACCAGATTTTG       |
| <i>Zscan4</i>                                                              | GAGATTCATGGAGAGTCTGACTGATGAGTG | GCTGTTGTTTCAAAGCTTGATGACTTC |
| <i>Testv3</i>                                                              | GATCTGCATCTTATAGTGCCA          | TGACTTTCTCACTTCTGGCG        |
| <i>Npm1</i>                                                                | CATGTCTGGAAAGCGATC             | CCTTTGATCTCGGTGTTG          |
| <i>Mllt3</i>                                                               | CGTCTCCACTTGCACGAAAG           | CCCGGACTCTTCTACCTTGTA       |
| <i>Mllt6</i>                                                               | TAGCCTGACAGCGAAGAAGG           | CAGCTTGAGGAAGCAGTCCA        |
| <i>Mllt10</i>                                                              | AGGACGAGGTCTCCCATAGTA          | GTGCCCGTCGCAATAAACC         |
| <i>H1.0</i>                                                                | CATCAAGCGCTAGTGACCA            | TCTTGACAGGGTGGCTTTG         |
| <i>H1.2</i>                                                                | CGCGTCTAAAGCCGTAAAGC           | CTTGGCTGCAACCTTCTTGG        |
| <i>Gapdh</i>                                                               | AGAAACCTGCCAAGTATGATGAC        | GTCATTGAGAGCAATGCCAG        |
| IAPEz                                                                      | AAATCAATCTGTTGTGTTCCAC         | ACCACATAACAGGAATCTGACAC     |
| ERVK10C                                                                    | TTCGCTCTGCAATCAAGCTCTC         | TCGCTCGTGCTGAAGATGTTTC      |
| IAPEY-int                                                                  | TTCCCTCAAGCAGTAGATAATGA        | GGCAGAGGTCCTTTATAGTCAGT     |
| ERVB4-2                                                                    | ACTTGATACCCAATGAATGG           | AGATTTTGTGACAGTCCAG         |
| MERVL                                                                      | AAGAGCCAAGACCTGCTGAG           | TCCTCGTTCTGCAACTGGT         |
| MT2                                                                        | GGCTACACCTTCTGCTGGAG           | TCGCAGCTGTGAATGGAAGT        |
| MTA                                                                        | TGGGTTCTATAAGAGAGCAGGC         | TGTTCTTACTGGCTGCCTCC        |
| SINEB1                                                                     | GTGGCGCACGCTTTAATC             | GACAGGGTTTCTCTGTGTAG        |
| <b>Gene</b>                                                                | <b>shRNA Sequence</b>          |                             |
| Control shRNA                                                              | GATGAAATGGGTAAGTACA            | <b><i>Dot1l</i> gRNA1</b>   |
| <i>Dot1l</i> shRNA1                                                        | CCTCGGTTTACACAGCTTCAA          | AGCCC GCCGTCTACCCGTGG       |
| <i>Dot1l</i> shRNA2                                                        | CGGCAGAATCGTATCCTCAAA          | <b><i>Dot1l</i> gRNA2</b>   |
| <i>Npm1</i> shRNA1                                                         | GGAAGATGCAGAGTCTGAA            | CTGAATACTCGGCCGTCCAA        |
| <i>Npm1</i> shRNA2                                                         | GCAGAAGCAATGAACTATGAA          |                             |
| <i>Mllt3</i> shRNA                                                         | CCCGCCACCATTATTGAAA            |                             |
| <i>Mllt6</i> shRNA                                                         | GCTTGCTATGGCATCGTCCA           |                             |
| <i>Mllt10</i> shRNA                                                        | GCAGTATCGACATGATGGA            |                             |

| <b>Supplementary Table S2. primary antibodies</b> |                                  |
|---------------------------------------------------|----------------------------------|
| <b>primary antibodies</b>                         | <b>Catalog</b>                   |
| Anti-Dot1l                                        | D4O2T, Cell Signaling Technology |
| Anti-H3K79me1                                     | ab2886, Abcam                    |
| Anti-H3K79me2                                     | ab3594, Abcam                    |
| Anti-H3K79me3                                     | C15410068, Diagenode             |
| Anti-Oct4                                         | sc-5279, Santa Cruz              |
| Anti-Sox2                                         | sc-365964, Santa Cruz            |
| Anti-Nanog                                        | sc-293121, Santa Cruz            |
| Anti-MERVL-gag                                    | A-2801, EpiGentek                |
| Anti-HA                                           | 30701ES60, Yeasen                |
| Anti-Npm1                                         | sc-271737, Santa Cruz            |
| Anti-Flag                                         | F1804, Sigma                     |
| Anti-H1.0                                         | A3298, ABclonal                  |
| Anti-H1.2                                         | 19649-1-AP, Proteintech          |
| Anti-H3                                           | 17168-1-AP, Proteintech          |
| Anti-Ubiquitin                                    | 10201-2-AP, Proteintech          |
| Anti- $\beta$ -actin                              | AC026, ABclonal                  |
